# Supplementary material for: Rootstock-Dependent Response of Hass Avocado to Salt Stress
Source: MDPI journal article supplement (doi:10.3390/plants10081672), 2021-08-13
Supplement: s1 [file s1]

**Table S1.** SD values for figures 1, 3, 4, 5, 6, 7, and 8.

| # Figure    | 1     |       |       |       | 3          | 4                |      | 5              |      | 6    | 7                   | 8     |
|-------------|-------|-------|-------|-------|------------|------------------|------|----------------|------|------|---------------------|-------|
| Rootstock   | Cl 19 | Cl 20 | Na 19 | Na 20 | Osmolality | Trunk<br>circum. | LAI  | g <sub>s</sub> | A    | NDRE | Trichome<br>density | FPT   |
| Degania 189 | 0.15  | 0.06  | 0.01  | 0.01  | 29.47      | 3.74             | 1.06 | 42.15          | 3.33 | 0.02 | 3.06                | 19.09 |
| Degania 62  | 0.33  | 0.12  | 0.01  | 0.02  | 75.67      | 5.99             | 0.74 | 98.42          | 3.47 | 0.02 | 2.58                | 33.17 |
| Dusa        | 0.04  | 0.11  | 0.01  | 0.01  | 55.73      | 4.76             | 1.31 | 135.56         | 4.92 | 0.02 | 4.99                | 13.68 |
| Nachlat 3   | 0.11  | 0.04  | 0.00  | 0.01  | 85.62      | 8.95             | 0.91 | 55.98          | 1.60 | 0.02 | 2.98                | 29.75 |
| VC 140      | 0.16  | 0.06  | 0.01  | 0.00  | 64.71      | 4.72             | 0.67 | 89.51          | 5.48 | 0.03 | 3.34                | 28.60 |
| VC 152      | 0.09  | 0.04  | 0.01  | 0.01  | 45.52      | 4.14             | 1.10 | 40.72          | 2.63 | 0.02 | 2.25                | 32.90 |
| VC 159      | 0.17  | 0.14  | 0.00  | 0.01  | 60.17      | 4.42             | 0.99 | 95.82          | 4.28 | 0.02 | 2.39                | 23.51 |
| VC 207      | 0.12  | 0.07  | 0.01  | 0.01  | 43.47      | 4.13             | 0.52 | 71.65          | 3.69 | 0.03 | 2.51                | 19.42 |
| VC 26       | 0.19  | 0.18  | 0.01  | 0.01  | 36.66      | 4.38             | 0.98 | 66.24          | 1.94 | 0.02 | NA                  | 4.41  |
| VC 28       | 0.08  | 0.10  | 0.01  | 0.00  | 64.86      | 6.14             | 1.29 | 61.20          | 2.84 | 0.02 | 2.48                | 47.37 |
| VC 320      | 0.11  | 0.12  | 0.00  | 0.00  | 51.17      | 4.70             | 0.90 | 66.87          | 3.63 | 0.02 | 1.86                | 27.72 |
| VC 55       | 0.04  | 0.07  | 0.01  | 0.00  | 28.76      | 6.50             | 0.89 | 70.93          | 5.56 | 0.01 | 1.88                | 18.06 |
| VC 66       | 0.01  | 0.02  | 0.01  | 0.00  | 47.63      | 5.18             | 0.95 | 63.72          | 3.32 | 0.02 | 2.52                | 19.06 |
| VC 68       | 0.04  | 0.11  | 0.01  | 0.01  | 65.21      | 4.95             | 0.65 | 158.31         | 4.17 | 0.02 | 2.04                | 45.00 |
| VC 801      | 0.10  | 0.07  | 0.01  | 0.00  | 40.79      | 4.57             | 0.52 | 59.36          | 2.51 | 0.03 | 2.59                | 16.10 |
| VC 802      | 0.28  | 0.05  | 0.01  | 0.01  | 40.41      | 6.75             | 1.41 | 44.72          | 3.23 | 0.02 | 2.54                | 7.79  |
| VC 804      | 0.09  | 0.08  | 0.01  | 0.00  | 49.00      | 5.20             | 0.80 | 118.18         | 4.84 | 0.02 | 1.55                | 16.51 |
| VC 840      | 0.25  | 0.25  | 0.01  | 0.03  | 91.68      | 5.29             | 1.53 | 79.12          | 3.59 | 0.05 | 3.05                | 37.73 |
| VC 96       | 0.30  | 0.15  | 0.01  | 0.00  | 81.16      | 2.34             | 0.28 | 70.69          | 3.40 | 0.01 | NA                  | 16.74 |
| Waldin      | 0.08  | 0.03  | 0.01  | 0.00  | 56.86      | 7.65             | 1.08 | 70.57          | 2.43 | 0.02 | 2.88                | 18.65 |
