# Supplementary material for: Rootstock-Dependent Response of Hass Avocado to Salt Stress
Source: MDPI journal article supplement (doi:10.3390/plants10081672), 2021-08-13
Supplement: s1 [file s1]

|    |               |                |                |                |    |
|----|---------------|----------------|----------------|----------------|----|
| 25 | 100, VC801    | 99, Degania62  | 98, VC68       | 97, VC152      | 25 |
| 24 | 96, VC66      | 95, VC26       | 94, VC320      | 93, VC840      | 24 |
| 23 | 92, VC804     | 91, VC28       | 90, VC159      | 89, Nachlat3   | 23 |
| 22 | 88, VC207     | 87, VC802      | 86, VC55       | 85, Dusa       | 22 |
| 21 | 84, VC96      | 83, VC140      | 82, Waldin     | 81, Degania189 | 21 |
| 20 | 80, VC55      | 79, VC66       | 78, VC152      | 77, VC96       | 20 |
| 19 | 76, VC28      | 75, Degania189 | 74, Nachlat3   | 73, VC26       | 19 |
| 18 | 72, Degania62 | 71, VC68       | 70, Waldin     | 69, VC207      | 18 |
| 17 | 68, VC840     | 67, VC802      | 66, VC804      | 65, VC801      | 17 |
| 16 | 64, VC140     | 63, VC320      | 62, Dusa       | 61, VC159      | 16 |
| 15 | 60, VC801     | 59, VC152      | 58, VC55       | 57, VC804      | 15 |
| 14 | 56, VC28      | 55, VC320      | 54, VC159      | 53, VC140      | 14 |
| 13 | 52, Waldin    | 51, Degania62  | 50, VC68       | 49, Degania189 | 13 |
| 12 | 48, VC27      | 47, VC840      | 46, VC802      | 45, VC162      | 12 |
| 11 | 44, VC207     | 43, Dusa       | 42, VC66       | 41, Nachlat3   | 11 |
| 10 | 40, VC801     | 39, VC804      | 38, VC802      | 37, V 320      | 10 |
| 9  | 36, Waldin    | 35, Nachlat3   | 34, Degania189 | 33, VC27       | 9  |
| 8  | 32, VC152     | 31, VC28       | 30, VC840      | 29, Degania62  | 8  |
| 7  | 28, Latas     | 27, VC68       | 26, VC207      | 25, Dusa       | 7  |
| 6  | 24, VC159     | 23, VC140      | 22, VC55       | 21, VC66       | 6  |
| 5  | 20, VC68      | 19, VC159      | 18, VC320      | 17, VC27       | 5  |
| 4  | 16, Degania62 | 15, Waldin     | 14, VC140      | 13, VC55       | 4  |
| 3  | 12, Nachlat3  | 11, Dusa       | 10, VC804      | 9, VC801       | 3  |
| 2  | 8, VC207      | 7, Degania189  | 6, VC66        | 5, VC840       | 2  |
| 1  | 4, Latas      | 3, VC152       | 2, VC28        | 1, VC802       | 1  |
| 24 | 23            | 22             | 21             | 20             | 19 |
| 18 | 17            | 16             | 15             | 14             | 13 |
| 12 | 11            | 10             | 9              | 8              | 7  |
| 6  | 5             | 4              | 3              | 2              | 1  |

Figure S1. The orchard map.
